# Supplementary material for: Optical coherence tomography features of neovascularization in proliferative diabetic retinopathy: a systematic review
Source: PubMed Central journal article supplement (PMC7322867; doi:10.1186/s40942-020-00230-3), 2020-06-29
Supplement: 40942_2020_230_MOESM2_ESM.pdf [file 40942_2020_230_MOESM2_ESM.pdf]

### Search Strategy

| Method No.                                                                 | Search terms                                                                                                                                                                                                                                                       |
|----------------------------------------------------------------------------|--------------------------------------------------------------------------------------------------------------------------------------------------------------------------------------------------------------------------------------------------------------------|
| PubMed<br>1.<br>2.<br>3.<br>4.<br>5.<br>6.<br>7.<br>8.<br>9.<br>10.<br>11. | Tomography, Optical Coherence [Majr]<br>Diabetic retinopathy [Majr]<br>Retinal neovascularization [Majr]<br>2 or 3<br>Humans [MeSH Terms]<br>English [lang]<br>French [lang]<br>Portuguese [lang]<br>Spanish [lang]<br>6 or 7 or 8 or 9<br>1 and 4 and 5 and 10    |
| PubMed<br>1.<br>2.<br>3.<br>4.<br>5.<br>6.<br>7.<br>8.<br>9.<br>10.<br>11. | Optical coherence tomography [All Fields]<br>OCT [All Fields]<br>1 or 2<br>Diabetic retinopathy [All Fields]<br>DR [All Fields]<br>Diabet* [All Fields]<br>Retinopathy [All Fields]<br>6 and 7<br>4 or 5 or 8<br>Neovascularization [All Fields]<br>3 and 9 and 10 |
| EMBASE<br>1.<br>2.<br>3.<br>4.<br>5.<br>6.<br>7.<br>8.<br>9.<br>10.        | Optical coherence tomography /exp<br>Retina neovascularization /exp<br>Diabetic retinopathy /exp<br>[humans] /lim<br>[english] /lim<br>[french] /lim<br>[portuguese] /lim<br>[spanish] /lim<br>5 or 6 or 7 or 8<br>1 and 2 and 3 and 4 and 9                       |
| EMBASE<br>1.<br>2.<br>3.<br>4.<br>5.<br>6.<br>7.<br>8.<br>9.<br>10.        | Neovascularization :ab,ti<br>Diabetic retinopathy :ab,ti<br>Optical coherence tomography :ab,ti<br>[humans] /lim<br>[english] /lim<br>[french] /lim<br>[portuguese] /lim<br>[spanish] /lim<br>5 or 6 or 7 or 8<br>1 and 2 and 3 and 4 and 9                        |
